# Supplementary material for: Fucoxanthin Exerts Anti-Tumor Activity on Canine Mammary Tumor Cells via Tumor Cell Apoptosis Induction and Angiogenesis Inhibition
Source: MDPI journal article supplement (doi:10.3390/ani11061512), 2021-05-23
Supplement: s1 [file s1]

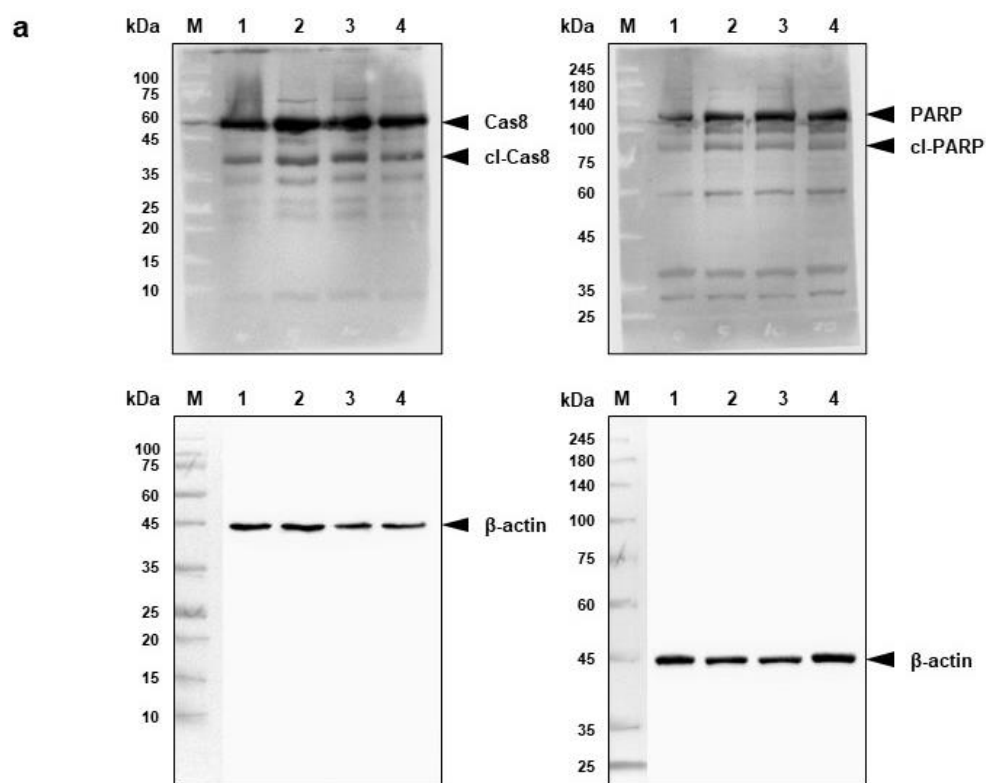

Lane M: Molecular weight markers  
 Lane 1: Untreated  
 Lane 2: Fucoxanthin (5  $\mu\text{g/ml}$ )  
 Lane 3: Fucoxanthin (10  $\mu\text{g/ml}$ )  
 Lane 4: Fucoxanthin (20  $\mu\text{g/ml}$ )

| CMT-U27                          |                      |                         |                      |                         |
|----------------------------------|----------------------|-------------------------|----------------------|-------------------------|
| Fucoxanthin ( $\mu\text{g/ml}$ ) | Cas8/ $\beta$ -actin | cl-Cas8/ $\beta$ -actin | PARP/ $\beta$ -actin | cl-PARP/ $\beta$ -actin |
| 0                                | 1.323564002          | 0.527500311             | 1.350730415          | 0.576089245             |
| 5                                | 3.224276246          | 0.633331105             | 2.979020537          | 0.738223759             |
| 10                               | 3.296589588          | 1.121295213             | 4.866831468          | 0.890435399             |
| 20                               | 2.335456798          | 0.924754964             | 3.513100665          | 0.804857263             |

**Figure S1. Immunoblots and densitometry reading/intensity ratio of apoptotic markers in CMT-U27 cells.** CMT-U27 cells were treated with 0, 5, 10, and 20  $\mu\text{g/ml}$  of fucoxanthin for 24 h. The protein expression of cas8 (55 kDa), cleaved-cas8 (43 kDa), PARP (116 kDa), and cleaved-PARP (89 kDa) was analyzed by (a) western blots and (b) densitometry reading/intensity ratio. The band intensity was normalized to the corresponding  $\beta$ -actin value. Cas8, caspase8; cl-Cas8, cleaved-caspase8; cl-PARP, cleaved-PARP.
